# Supplementary material for: Rapid Screening and Identification of Diterpenoids in Tinospora sinensis Based on High-Performance Liquid Chromatography Coupled with Linear Ion Trap-Orbitrap Mass Spectrometry
Source: PubMed Central journal article supplement (PMC6152629; doi:10.3390/molecules22060912), 2017-05-31
Supplement: molecules-22-00912-s001.pdf [file molecules-22-00912-s001.pdf]

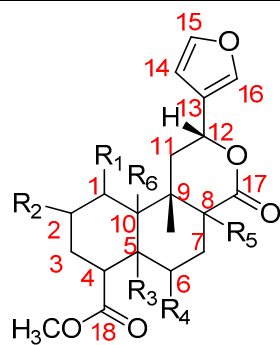

|    | R <sub>1</sub> | R <sub>2</sub> | R <sub>3</sub> | R <sub>4</sub>                 | R <sub>5</sub> | R <sub>6</sub> |
|----|----------------|----------------|----------------|--------------------------------|----------------|----------------|
| 1  | OMe            | OMe            | $\beta$ -Me    | $\beta$ -OGlc(Ac) <sub>4</sub> | $\beta$ -H     | $\beta$ -H     |
| 8  | $\alpha$ -OAc  | OH             | $\beta$ -H     | $\alpha$ -OGlc                 | H              | $\alpha$ -H    |
| 25 | H              | $\alpha$ -OAc  | $\beta$ -H     | $\alpha$ -OGlc                 | $\beta$ -OH    | $\alpha$ -H    |
| 43 | H              | $\alpha$ -OAc  | $\beta$ -H     | $\alpha$ -OGlc                 | $\alpha$ -OH   | $\alpha$ -H    |

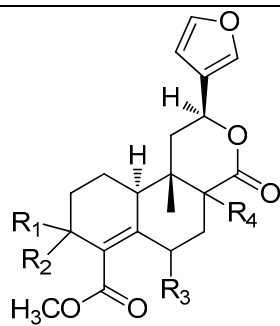

|    | R <sub>1</sub>              | R <sub>2</sub> | R <sub>3</sub>              | R <sub>4</sub> |
|----|-----------------------------|----------------|-----------------------------|----------------|
| 2  | H                           | H              | $\alpha$ -O- $\beta$ -D-Glc | $\beta$ -OH    |
| 6  | $\alpha$ -O- $\beta$ -D-Glc | $\beta$ -H     | H                           | $\beta$ -OH    |
| 16 | H                           | H              | $\alpha$ -OGlc              | $\alpha$ -H    |

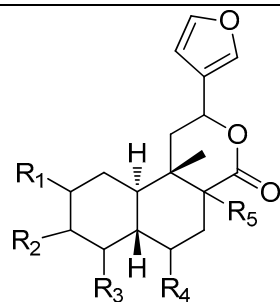

|    | R <sub>1</sub> | R <sub>2</sub> | R <sub>3</sub> | R <sub>4</sub> | R <sub>5</sub> |
|----|----------------|----------------|----------------|----------------|----------------|
| 3  | $\alpha$ -OAc  | $\alpha$ -OAc  | $\beta$ -OH    | $\alpha$ -OGlc | $\beta$ -H     |
| 5  | $\alpha$ -OH   | $\alpha$ -OH   | $\alpha$ -OGlc | H              | $\beta$ -OH    |
| 14 | $\alpha$ -OAc  | $\alpha$ -OAc  | $\beta$ -OH    | $\alpha$ -OGlc | $\alpha$ -H    |
| 18 | $\alpha$ -OH   | $\alpha$ -OH   | $\alpha$ -OGlc | $\beta$ -OH    | H              |
| 20 | $\alpha$ -OAc  | $\alpha$ -OAc  | $\alpha$ -OGlc | H              | $\beta$ -OH    |

|    |               |               |                |   |             |
|----|---------------|---------------|----------------|---|-------------|
| 31 | $\alpha$ -OAc | $\alpha$ -OH  | $\alpha$ -OGlc | H | $\beta$ -OH |
| 38 | $\alpha$ -OAc | $\alpha$ -OAc | $\alpha$ -OGlc | H | $\beta$ -H  |
| 48 | $\alpha$ -OAc | $\alpha$ -OH  | $\alpha$ -OGlc | H | $\beta$ -H  |

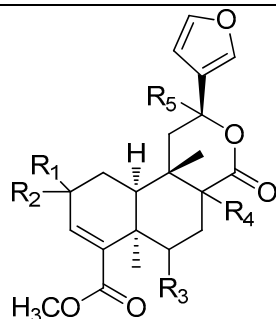

|    | R <sub>1</sub> | R <sub>2</sub>      | R <sub>3</sub>                                                      | R <sub>4</sub> | R <sub>5</sub> |
|----|----------------|---------------------|---------------------------------------------------------------------|----------------|----------------|
| 4  | $\beta$ -H     | $\alpha$ -OH        | $\beta$ -O- $\{\beta$ -D-Glc-(1 $\rightarrow$ 6)- $\alpha$ -D-xylo} | H              | $\alpha$ -H    |
| 9  | H              | $\alpha$ -OH        | $\beta$ -O-( $\beta$ -D-Glc)                                        | $\alpha$ -H    | H              |
| 11 | H              | $\alpha$ -OGlc      | H                                                                   | $\beta$ -OH    | $\alpha$ -H    |
| 19 | $\beta$ -H     | $\alpha$ -OH        | $\beta$ -O-( $\beta$ -D-Glc)                                        | $\beta$ -H     | $\alpha$ -H    |
| 27 | H              | $\alpha$ -OGlc      | $\alpha$ -OGlc                                                      | $\alpha$ -H    | H              |
| 28 |                | =O                  | $\beta$ -O-( $\beta$ -D-Glc)                                        | $\alpha$ -H    | $\alpha$ -H    |
| 36 | $\beta$ -H     | $\alpha$ -H         | $\beta$ -O-( $\beta$ -D-Glc)                                        | $\beta$ -H     | $\alpha$ -H    |
| 44 | H              | H                   | $\beta$ -OGlc                                                       | H              | $\alpha$ -H    |
| 46 | $\beta$ -H     | $\alpha$ -OH        | $\beta$ -O- $\{\beta$ -D-xylo-(1 $\rightarrow$ 6)- $\alpha$ -D-Glc} | H              | $\alpha$ -H    |
| 50 | H              | $\alpha$ -OH        | $\alpha$ -OGlc(lactoyl)                                             | $\alpha$ -H    | H              |
| 59 | H              | $\alpha$ -O-lactoyl | $\alpha$ -OGlc                                                      | $\alpha$ -H    | H              |

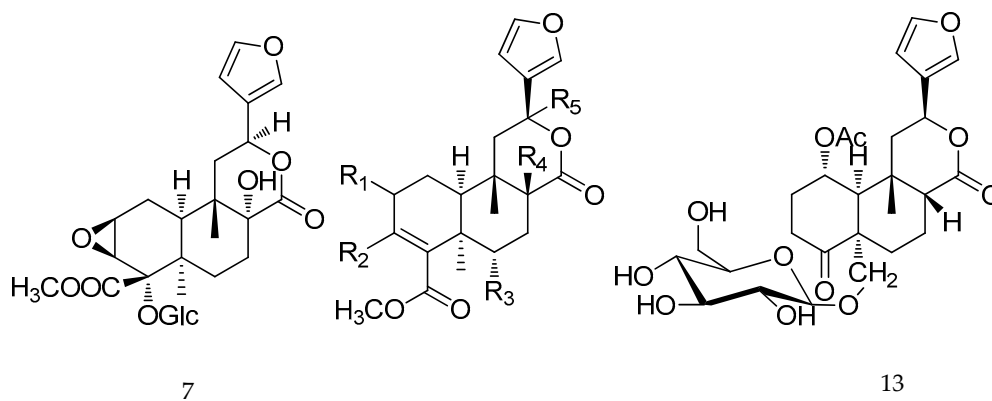

|    | R <sub>1</sub> | R <sub>2</sub> | R <sub>3</sub> | R <sub>4</sub> | R <sub>5</sub> |
|----|----------------|----------------|----------------|----------------|----------------|
| 10 | H              | OH             | OGlc           | $\beta$ -OH    | H              |
| 55 | $\alpha$ -OGlc | H              | H              | $\alpha$ -OH   | $\alpha$ -H    |

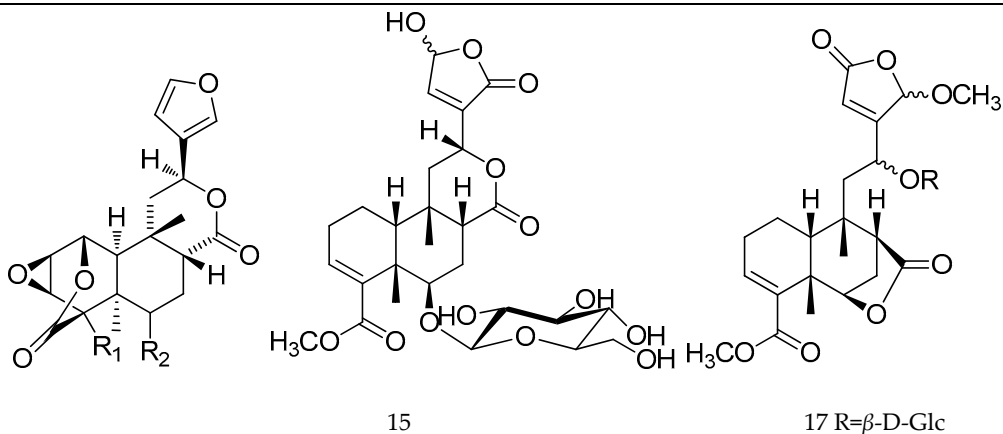

|    | R <sub>1</sub>                | R <sub>2</sub>                |
|----|-------------------------------|-------------------------------|
| 12 | H                             | $\alpha$ -O-( $\beta$ -D-Glc) |
| 21 | $\alpha$ -O-( $\beta$ -D-Glc) | H                             |

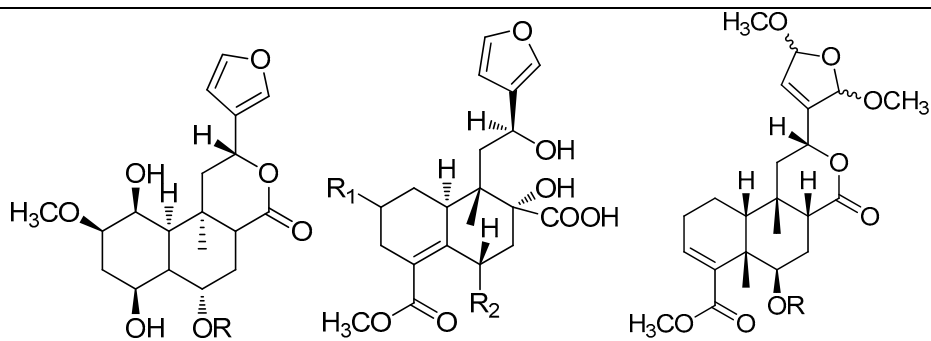

|    | R <sub>1</sub>              | R <sub>2</sub>              |
|----|-----------------------------|-----------------------------|
| 23 | H                           | $\alpha$ -O- $\beta$ -D-Glc |
| 37 | $\alpha$ -O- $\beta$ -D-Glc | H                           |

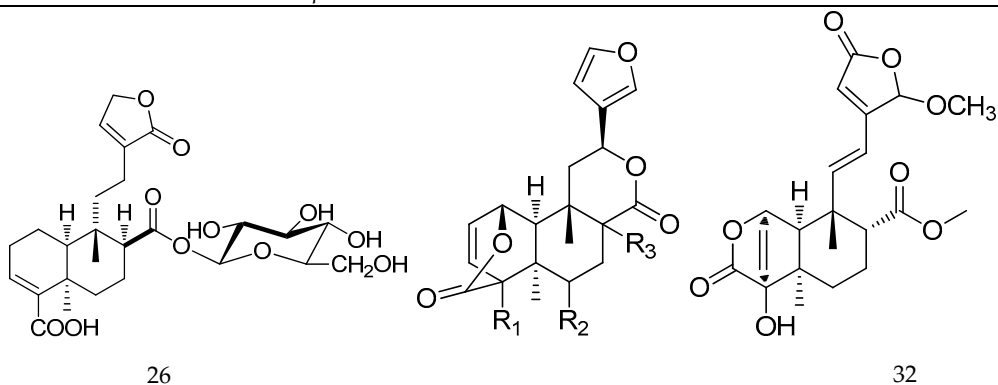

|    | R <sub>1</sub> | R <sub>2</sub> | R <sub>3</sub> |
|----|----------------|----------------|----------------|
| 29 | $\beta$ -OH    | H              | H              |
| 30 | $\alpha$ -OGlc | H              | $\alpha$ -H    |
| 40 | $\alpha$ -OH   | H              | $\beta$ -OH    |
| 41 | OH             | $\alpha$ -OH   | $\beta$ -H     |
| 51 | $\alpha$ -OH   | H              | $\beta$ -H     |

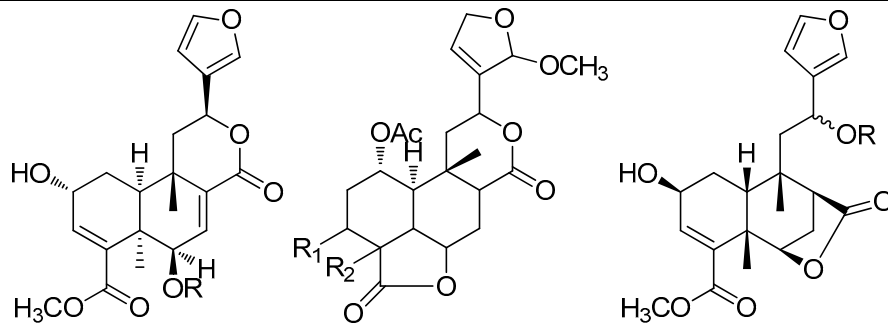

|    | R <sub>1</sub> | R <sub>2</sub>     |
|----|----------------|--------------------|
| 34 | $\alpha$ -OGlc | 35 R= $\beta$ -Glc |
| 49 | H              | H                  |
|    |                | $\alpha$ -OGlc     |

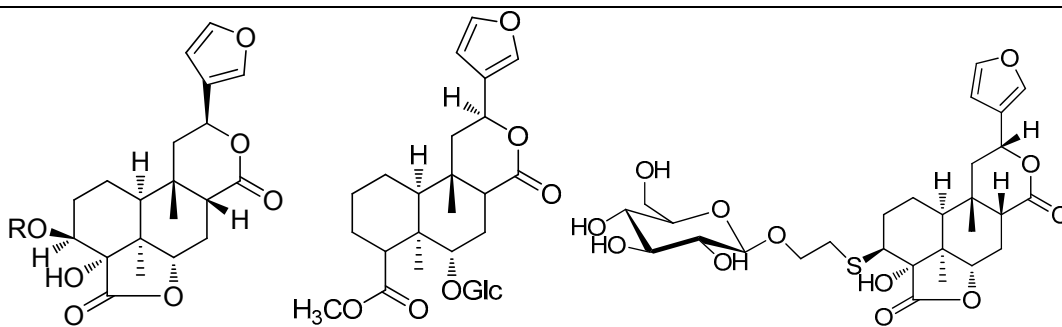

39 R= $\beta$ -D-Glc

42

45

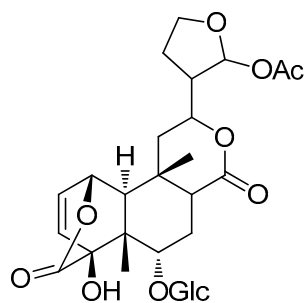

47

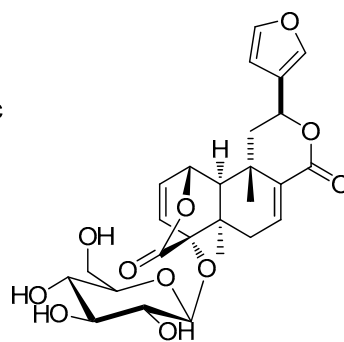

52

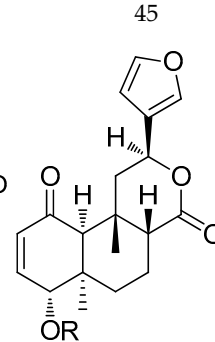

53 R= $\beta$ -D-Glc

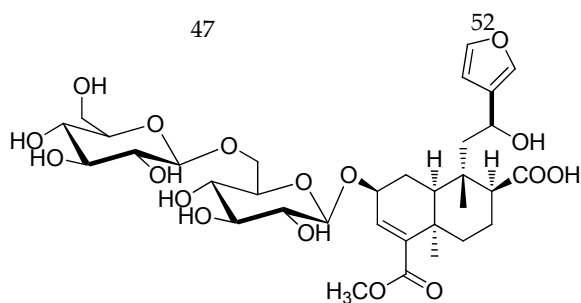

54

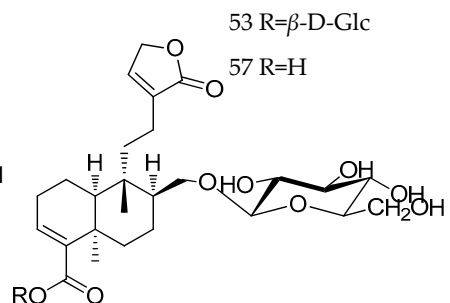

56 R=Glc

58 R=H

57 R=H

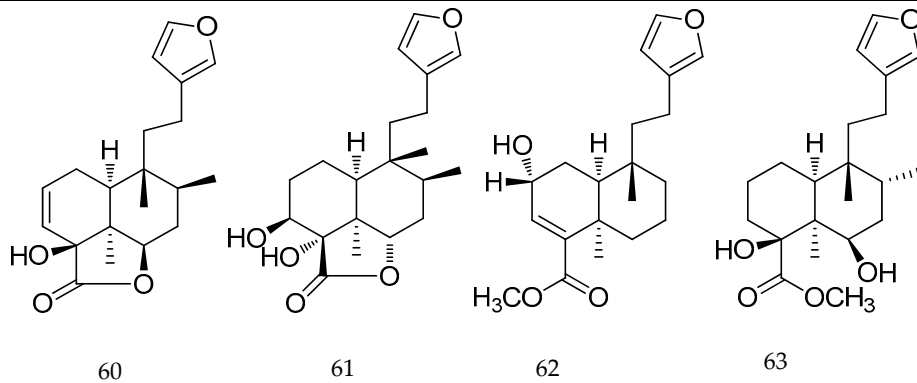

**Figure A.** The structure of chemical constituents identified in *Tinospora sinensis* by HPLC-LTQ-Orbitrap

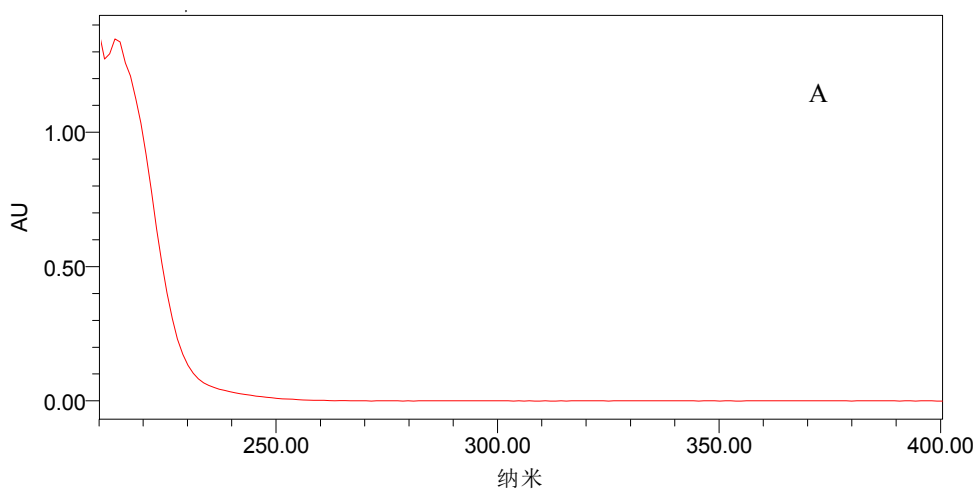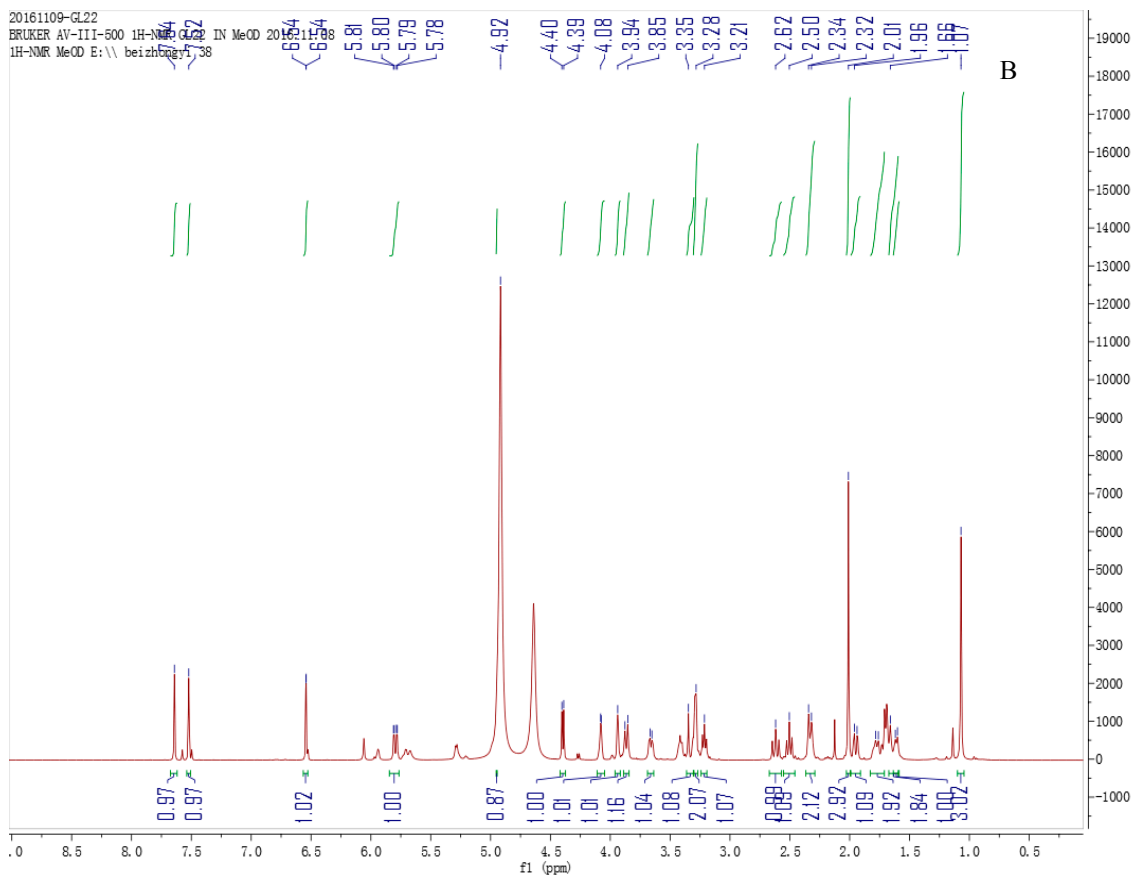

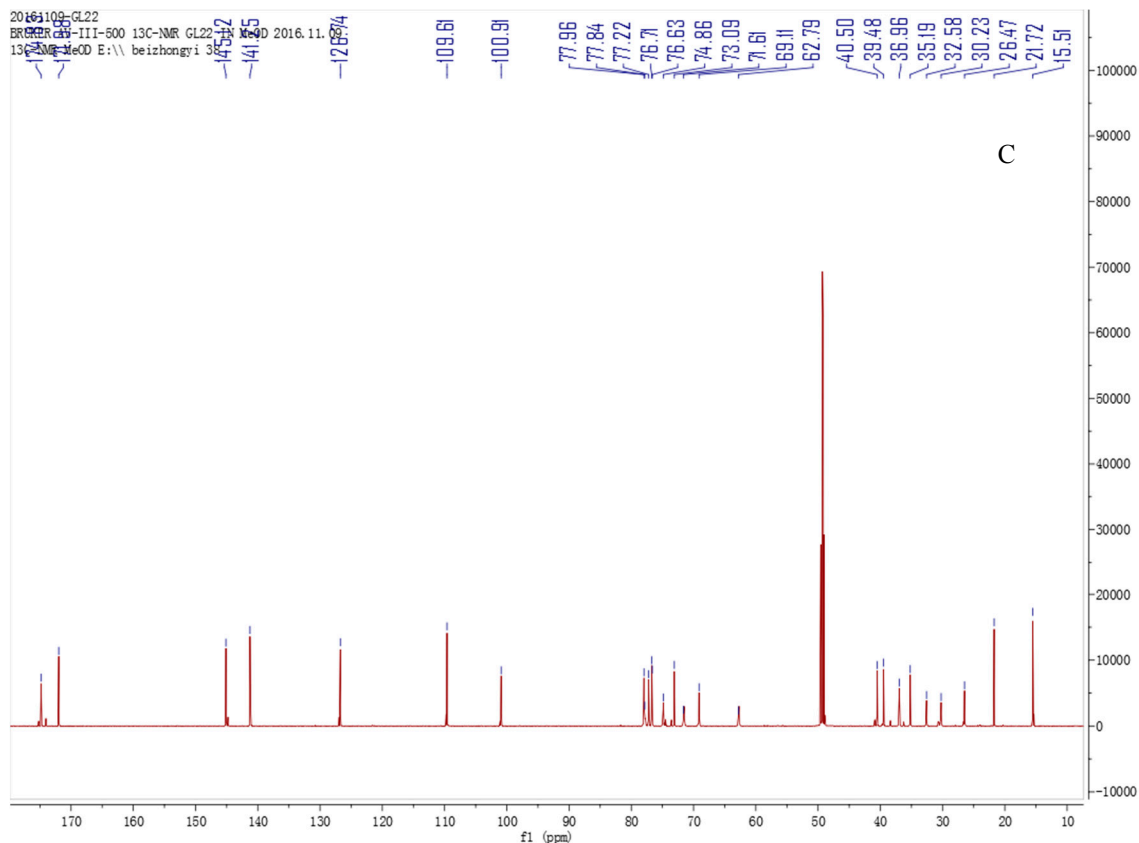

**Figure B.** A UV figure for Tinosineside A; **B**  $^1\text{H}$  NMR of Tinosineside A; **C**  $^{13}\text{C}$  NMR of Tinosineside A

**Table A.**  $^1\text{H}$ -(500MHz) NMR spectral data of Tinosineside A

| No. | $^1\text{H}$ -NMR            | Reference data               |
|-----|------------------------------|------------------------------|
| 1   | 4.93 (1H, dd, J=11.0,2.4Hz)  | 4.93 (1H, dd, J=11.2,2.8Hz)  |
| 2   | 4.08 (1H, brd, J=2.4Hz)      | 4.07 (1H, brd, J=2.8Hz)      |
| 3a  | 1.66 (1H, m)                 | 1.68 (1H, m)                 |
| 3b  | 2.33 (1H, m)                 | 2.33 (1H, m)                 |
| 4   | 3.94 (1H, brs)               | 3.93 (1H, brs)               |
| 5   | 1.77 (1H, m)                 | 1.77 (1H, m)                 |
| 6a  | 1.60 (1H, s)                 | 1.60 (1H, s)                 |
| 6b  | 1.77 (1H, m)                 | 1.77 (1H, m)                 |
| 7a  | 1.66 (1H, m)                 | 1.68 (1H, m)                 |
| 7b  | 2.33 (1H, m)                 | 2.33 (1H, m)                 |
| 10  | 2.50 (1H, dd, J=11.0,11.1Hz) | 2.53 (1H, dd, J=11.2,10.0Hz) |
| 11a | 1.95 (1H, dd, J=14.4,3.3Hz)  | 1.97 (1H, dd, J=14.2,3.7Hz)  |
| 11b | 2.62 (1H, dd, J=14.4,12.6Hz) | 2.63 (1H, dd, J=14.2,12.6Hz) |
| 12  | 5.79 (1H, dd, J=12.6,3.4Hz)  | 5.78 (1H, dd, J=12.6,3.7Hz)  |
| 14  | 6.54 (1H, d, J=1.0Hz)        | 6.52 (1H, dd, J=1.2,0.7Hz)   |

|                   |                             |                             |
|-------------------|-----------------------------|-----------------------------|
| 15                | 7.52 (1H, m)                | 7.49 (1H, m)                |
| 16                | 7.64 (1H, brs)              | 7.60 (1H, d, J=0.7Hz)       |
| 20                | 1.07 (3H, s)                | 1.07 (3H, s)                |
| COCH <sub>3</sub> | 2.01 (3H, s)                | 1.99 (3H, s)                |
| 1'                | 4.39 (1H, d, J=7.8Hz)       | 4.37 (1H, d, J=7.8Hz)       |
| 2'                | 3.21 (1H, dd, J=8.3,7.8Hz)  | 3.19 (1H, dd, J=9.2,7.8Hz)  |
| 3'                | 3.35 (1H, dd, J=8.3,5.6Hz)  | 3.37 (1H, dd, J=9.2,9.2Hz)  |
| 4'                | 3.28 (1H, dd, J=5.6,8.6Hz)  | 3.27 (1H, dd, J=9.2,9.2Hz)  |
| 5'                | 3.24 (1H, m)                | 3.25 (1H, m)                |
| 6'a               | 3.66 (1H, dd, J=11.7,7.5Hz) | 3.64 (1H, dd, J=11.9,5.5Hz) |
| 6'b               | 3.86 (1H, dd, J=11.7,1.6Hz) | 3.84 (1H, dd, J=11.9,1.9Hz) |

**Table B.** <sup>13</sup>C-(500MHz) NMR spectral data of Tinosineside A

| No. | <sup>13</sup> C-NMR | Reference data | No.                     | <sup>13</sup> C-NMR | Reference data |
|-----|---------------------|----------------|-------------------------|---------------------|----------------|
| 1   | 77.2                | 77.4           | 14                      | 109.6               | 109.6          |
| 2   | 69.1                | 69.3           | 15                      | 145.1               | 145.0          |
| 3   | 32.6                | 32.8           | 16                      | 141.3               | 141.3          |
| 4   | 76.7                | 76.8           | 17                      | 174.8               | 174.8          |
| 5   | 39.5                | 39.9           | 20                      | 15.5                | 15.5           |
| 6   | 26.5                | 26.6           | <u>COCH<sub>3</sub></u> | 172.0               | 171.6          |
| 7   | 30.2                | 30.5           | <u>COCH<sub>3</sub></u> | 21.8                | 21.6           |
| 8   | 76.6                | 76.7           | Glc-1'                  | 100.9               | 101.2          |
| 9   | 40.5                | 40.7           | -2'                     | 74.9                | 75.1           |
| 10  | 35.2                | 35.4           | -3'                     | 78.0                | 78.2           |
| 11  | 37.0                | 37.2           | -4'                     | 71.6                | 71.9           |
| 12  | 73.1                | 73.2           | -5'                     | 77.8                | 78.2           |
| 13  | 126.7               | 127.1          | -6'                     | 62.8                | 63.1           |
